# Supplementary material
Source: PubMed Central journal article supplement (PMC3341003)
Supplement: 1116972109_pnas.201116972SI.pdf [file 1116972109_pnas.201116972SI.pdf]

# Supporting Information

Hayashi et al. 10.1073/pnas.1116972109

## SI Materials and Methods

**Screening of Heterochromatin Silencing Defect Mutants.** Strain AHY420, which harbors three marker genes (*otr1R::ade6<sup>+</sup>*, *otr2::LEU2*, and *Kint2::ura4<sup>+</sup>*) was treated with 3 mg/mL *N*-methyl-*N'*-nitro-*N*-nitrosoguanidine for 30 min at 30 °C. The mutagenized cells were incubated overnight at 26 °C and plated on yeast extract plates. After 3–5 d, 466 white/pink colonies were picked up and streaked on YEA plates to obtain single colonies (master plates). The cells were then replicated on minimal medium (EMM) lacking leucine or EMM lacking uracil to examine the silencing defect of the other marker genes. In this first screen, we obtained 26 mutants that showed a silencing defect for all the marker genes (*Ade<sup>+</sup>*, *Leu<sup>+</sup>*, and *Ura<sup>+</sup>*) and 65 mutants that showed a centromeric-specific silencing defect (*Ade<sup>+</sup>*, *Leu<sup>+</sup>*, and *Ura<sup>-</sup>*). These mutants were further subjected to three backcrosses, and mutants that displayed an uncertain phenotype were excluded from further analysis. Finally, we isolated 15 mutants that showed a global silencing defect and 31 mutants with a centromere-specific silencing defect. To identify the corresponding genes of these mutants, the mutant cells were transformed with a fission yeast genomic library pTN-L1 (National BioResource Project). 5FOA-resistant colonies were isolated by replica plating from ~50,000 transformants. The plasmids were recovered from the isolated cells and introduced into *Escherichia coli* for DNA sequencing.

**RNA Preparation and RT-PCR Analysis.** RNA preparation and RT-PCR analyses were carried out as described previously (1). DNase I-treated total RNA prepared from each strain was subjected to quantitative RT-PCR analysis using the One Step SYBR PrimeScript RT-PCR Kit II (TaKaRa) and the 7300 Real-Time

PCR system (ABI). The primers used in these analyses are listed in Table S3.

**RNA Analysis.** Total RNA was extracted and centromeric transcripts were detected as described previously (1). Small RNAs were detected as described previously (2), with some modifications. The total RNA prepared from cells growing at exponential phase in YEA medium was fractionated using a mirVana miRNA Isolation Kit (Ambion). The collected small RNAs (5–10 µg) were resolved on a 15% (wt/vol) denaturing PAGE gel and transferred to nylon membrane (Hybond-N+; GE Healthcare). A 367-bp region within centromeric *dh* repeats was amplified with primers SP6-dhII-Fw and T7-dhII-Rv, and the amplified products were used as a template for in vitro transcription utilizing SP6 or T7 RNA polymerase. <sup>32</sup>P-labeled riboprobes were incubated in hydrolysis buffer (60 mM NaHCO<sub>3</sub> and 90 mM NaCO<sub>3</sub>) at 60 °C for 2–2.5 h and used for hybridization. Small RNA blots were also hybridized with an oligonucleotide complementary to the *S. pombe* U6 snRNA.

**Fluorescence Microscopy.** EGFP-fused Ers1 protein was expressed under control of the *nmt41* promoter. Live-cell imaging was carried out as described previously (3). Cells were cultured in EMM lacking leucine to early-log phase at 26 °C. The cells were suspended in EMM and mounted on a slide glass sealed with silicon for microscope observation. Zeiss AxioVision 3.1 was used for image acquisition and analysis. For categorization of EGFP-Ers1 nuclear dots, the value of fluorescent intensity (FI) of the brightest pixel within each spot was used and categorized as strong (FI ≥ 200), moderate (200 > FI > 180), or weak (180 > FI). The average background FI in the nucleus was around 90.

1. Iida T, Kawaguchi R, Nakayama J (2006) Conserved ribonuclease, Eri1, negatively regulates heterochromatin assembly in fission yeast. *Curr Biol* 16:1459–1464.
2. Kato H, et al. (2005) RNA polymerase II is required for RNAi-dependent heterochromatin assembly. *Science* 309:467–469.

3. Hayashi A, et al. (2009) Localization of gene products using a chromosomally tagged GFP-fusion library in the fission yeast *Schizosaccharomyces pombe*. *Genes Cells* 14: 217–225.





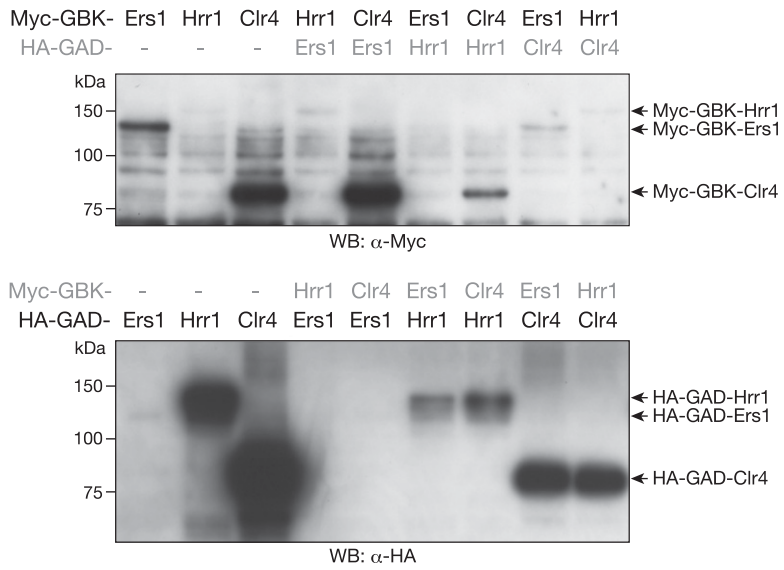

**Fig. S3.** Detection of fused proteins expressed in YTH analysis. Western blot (WB) analysis of activation domain (GAD)- or binding domain (GBD)-fused proteins. The GAD-fused and GBD-fused proteins were detected using anti-Myc (*Upper*) and anti-HA antibodies (*Lower*), respectively. Arrows indicate bands for each fusion protein.



## ChIP

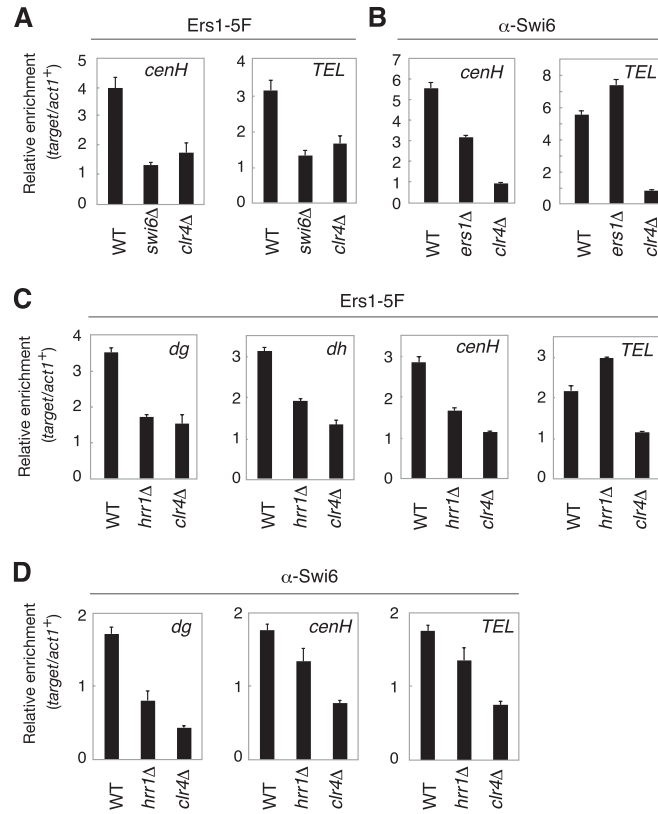

**Fig. S5.** Ers1 localization is dependent on Swi6. ChIP analysis of Ers1-Flag (A and C) and Swi6 (B and D) levels associated with centromeric *dg* and *dh*, the mating-type locus (*cenH*), and telomere (TEL) regions, relative to *act1<sup>+</sup>*. Immunoprecipitated DNA was subjected to quantitative PCR analysis. Results are the mean  $\pm$  SD of at least three independent experiments.







**Table S1. Result of YTH assay using Ers1 as bait**

| Gene                       | Product       | Residues/full length, aa     | Frequency |
|----------------------------|---------------|------------------------------|-----------|
| <i>swi6<sup>+</sup></i>    | HP1           | 987/987                      | 1         |
|                            |               | 684–987/987 (containing CSD) | 1         |
| <i>taf111<sup>+</sup></i>  | TFIID subunit | 2103–2940/2940               | 4         |
|                            |               | 2139–2940/2940               | 1         |
| <i>rpl3202<sup>+</sup></i> | 60S ribosomal | 16–384/384                   | 1         |

CSD, chromoshadow domain.

**Table S2. List of strains used in this study**

| Strain  | Genotype                                                                                                                                               |
|---------|--------------------------------------------------------------------------------------------------------------------------------------------------------|
| AHY420  | <i>h90 ade6-M210 his2 leu1-32 ura4-D18 otr1R::ade6<sup>+</sup> otr2::LEU2 Kint2::ura4<sup>+</sup></i>                                                  |
| FY648   | <i>h<sup>+</sup> ade6-M210 leu1-32 ura4DSIE otr1R::ura4<sup>+</sup></i>                                                                                |
| SPIT27  | <i>h<sup>+</sup> ade6-210 ura4DSIE leu1-32 otr1::ura4<sup>+</sup> dcr1Δ::kanR</i>                                                                      |
| SPIT31  | <i>h<sup>+</sup> ade6-210 ura4DSIE leu1-32 otr1::ura4<sup>+</sup> ago1Δ::kanR</i>                                                                      |
| SPIT34  | <i>h<sup>+</sup> ade6-210 ura4DSIE leu1-32 otr1::ura4<sup>+</sup> rdp1Δ::kanR</i>                                                                      |
| SPIT38  | <i>h<sup>+</sup> ade6-M210 leu1-32 ura4DSIE otr1R::ura4<sup>+</sup> swi6Δ::kanR</i>                                                                    |
| AHY488  | <i>h90 ade6-M216 leu1-32 ura4-D18 ers1<sup>+</sup>::ers1-13Myc-kanR</i>                                                                                |
| AHY490  | <i>h90 ade6-M210 leu1-32 ura4-D18 hrr1<sup>+</sup>::hrr1-5Flag-kanR</i>                                                                                |
| AHY491  | <i>h<sup>+</sup> ade6-M210 leu1-32 ura4DSIE otr1R::ura4<sup>+</sup> ers1Δ::nat</i>                                                                     |
| C62     | <i>h<sup>+</sup> ade6-M210 leu1-32 ura4-D18 otr1R::ura4<sup>+</sup> ers1(C62) his7-366</i>                                                             |
| AHY498  | <i>h<sup>+</sup> ade6-M210 leu1-32 ura4DSIE otr1R::ura4<sup>+</sup> ers1<sup>+</sup>::ers1-5Flag-kanR</i>                                              |
| AHY504  | <i>h<sup>+</sup> ade6-M210 leu1-32 ura4DSIE otr1R::ura4<sup>+</sup> ers1<sup>+</sup>::ers1-13Myc-kanR hrr1<sup>+</sup>::hrr1-5Flag-kanR</i>            |
| AHY511  | <i>h<sup>+</sup> ade6-M210 leu1-32 ura4-D18 otr1R::ura4<sup>+</sup> hrr1<sup>+</sup>::hrr1-5Flag-kanR</i>                                              |
| AHY513  | <i>h90 ade6-M216 leu1-32 ura4-D18 otr1R::ura4<sup>+</sup> ers1(C62)::C62-13Myc-kanR</i>                                                                |
| AHY514  | <i>h<sup>+</sup> ade6-M210 leu1-32 ura4-D18 otr1R::ura4<sup>+</sup> ers1(C62)::C62-13Myc-kanR hrr1<sup>+</sup>::hrr1-5Flag-kanR</i>                    |
| AHY526  | <i>h<sup>+</sup> ade6-M210 leu1-32 ura4DSIE otr1R::ura4<sup>+</sup> chp1<sup>+</sup>::chp1-5Flag-kanR</i>                                              |
| AHY527  | <i>h<sup>+</sup> ade6-M216 leu1-32 ura4DSIE otr1R::ura4<sup>+</sup> hrr1<sup>+</sup>::hrr1-5Flag-kanR</i>                                              |
| AHY528  | <i>h<sup>+</sup> ade6-M210 leu1-32 ura4DSIE otr1R::ura4<sup>+</sup> rdp1<sup>+</sup>::rdp1-5Flag-kanR</i>                                              |
| AHY530  | <i>h<sup>+</sup> ade6-M210 leu1-32 ura4DSIE otr1R::ura4<sup>+</sup> chp1<sup>+</sup>::chp1-5Flag-kanR ers1Δ::nat</i>                                   |
| AHY531  | <i>h<sup>+</sup> ade6-M210 leu1-32 ura4DSIE otr1R::ura4<sup>+</sup> rdp1<sup>+</sup>::rdp1-5Flag-kanR ers1Δ::nat</i>                                   |
| AHY533  | <i>h<sup>+</sup> ade6-M216 leu1-32 ura4DSIE otr1R::ura4<sup>+</sup> hrr1<sup>+</sup>::hrr1-5Flag-kanR ers1Δ::nat</i>                                   |
| AHY536  | <i>h<sup>+</sup> ade6-M210 leu1-32 ura4DSIE otr1R::ura4<sup>+</sup> chp1<sup>+</sup>::chp1-5Flag-kanR clr4Δ::nat</i>                                   |
| AHY537  | <i>h<sup>+</sup> ade6-M210 leu1-32 ura4DSIE otr1R::ura4<sup>+</sup> rdp1<sup>+</sup>::rdp1-5Flag-kanR clr4Δ::nat</i>                                   |
| AHY539  | <i>h<sup>+</sup> ade6-M216 leu1-32 ura4DSIE otr1R::ura4<sup>+</sup> hrr1<sup>+</sup>::hrr1-5Flag-kanR clr4Δ::nat</i>                                   |
| AHY546  | <i>h<sup>+</sup> ade6-M210 leu1-32 ura4DSIE otr1R::ura4<sup>+</sup> chp1<sup>+</sup>::chp1-5Flag-kanR swi6Δ::nat</i>                                   |
| AHY547  | <i>h<sup>+</sup> ade6-M210 leu1-32 ura4DSIE otr1R::ura4<sup>+</sup> rdp1<sup>+</sup>::rdp1-5Flag-kanR swi6Δ::nat</i>                                   |
| AHY549  | <i>h<sup>+</sup> ade6-M216 leu1-32 ura4DSIE otr1R::ura4<sup>+</sup> hrr1<sup>+</sup>::hrr1-5Flag-kanR swi6Δ::nat</i>                                   |
| AHY552  | <i>h<sup>+</sup> ade6-M210 leu1-32 ura4DSIE otr1R::ura4<sup>+</sup> ers1<sup>+</sup>::ers1-13Myc-kanR swi6Δ::nat</i>                                   |
| AHY554  | <i>h<sup>+</sup> ade6-M210 leu1-32 ura4DSIE otr1R::ura4<sup>+</sup> ers1<sup>+</sup>::ers1-5Flag-kanR swi6Δ::nat</i>                                   |
| AHY555  | <i>h<sup>+</sup> ade6-M210 leu1-32 ura4DSIE otr1R::ura4<sup>+</sup> ers1<sup>+</sup>::ers1-5Flag-kanR clr4Δ::nat</i>                                   |
| AHY558  | <i>h<sup>+</sup> ade6-M210 leu1-32 ura4DSIE otr1R::ura4<sup>+</sup> tas3<sup>+</sup>::tas3-5F10H-hygR hrr1<sup>+</sup>::hrr1-13Myc-kanR</i>            |
| AHY563  | <i>h<sup>+</sup> ade6-M216 leu1-32 ura4DSIE otr1R::ura4<sup>+</sup> hrr1<sup>+</sup>::hrr1-13Myc-kanR</i>                                              |
| AHY565  | <i>h<sup>+</sup> ade6-M210 leu1-32 ura4DSIE otr1R::ura4<sup>+</sup> tas3<sup>+</sup>::tas3-5F10H-hygR hrr1<sup>+</sup>::hrr1-13Myc-kanR clr4Δ::nat</i> |
| SPIT270 | <i>h<sup>+</sup> ade6-M210 leu1-32 ura4DSIE otr1R::ura4<sup>+</sup> tas3<sup>+</sup>::tas3-5F10H-hygR</i>                                              |
| AHY570  | <i>h<sup>+</sup> ade6-M210 leu1-32 ura4DSIE otr1R::ura4<sup>+</sup> tas3::tas3-5F10H-hygR hrr1::hrr1-13Myc-kanR ers1Δ::nat</i>                         |
| AHY571  | <i>h<sup>+</sup> ade6-M210 leu1-32 ura4DSIE otr1R::ura4<sup>+</sup> tas3::tas3-5F10H-hygR hrr1::hrr1-13Myc-kanR dcr1Δ::nat</i>                         |
| AHY580  | <i>h<sup>+</sup> ade6-M210 leu1-32 ura4DSIE otr1R::ura4<sup>+</sup> swi6Δ::kanMX6 ers1Δ::nat</i>                                                       |
| AHY587  | <i>h<sup>+</sup> ade6-M210 leu1-32 ura4DSIE otr1R::ura4<sup>+</sup> hrr1Δ::hygR</i>                                                                    |
| AHY613  | <i>h<sup>+</sup> ade6-M210 leu1-32 ura4DSIE otr1R::ura4<sup>+</sup> ers1<sup>+</sup>::ers1-13Myc-kanR swi6::pAL2HBP-3Flag</i>                          |
| AHY617  | <i>h<sup>+</sup> ade6-M216 leu1-32 ura4DSIE otr1R::ura4<sup>+</sup> hrr1<sup>+</sup>::hrr1-13Myc-kanR swi6::pAL2HBP-3Flag</i>                          |
| AHY618  | <i>h<sup>+</sup> ade6-M210 leu1-32 ura4DSIE otr1R::ura4<sup>+</sup> hrr1<sup>+</sup>::hrr1-13Myc-kanR</i>                                              |
| AHY619  | <i>h<sup>+</sup> ade6-M210 leu1-32 ura4DSIE otr1R::ura4<sup>+</sup> ers1<sup>+</sup>::ers1-13Myc-kanR</i>                                              |
| AHY622  | <i>h90 ade6-M216 leu1-32 ura4-D18 otr1R::ura4<sup>+</sup> ers1(C62)::C62-13Myc-kanR swi6::pAL2HBP-3Flag</i>                                            |
| AHY623  | <i>h<sup>+</sup> ade6-M210 leu1-32 ura4DSIE otr1R::ura4<sup>+</sup> tas3<sup>+</sup>::tas3-5F10H-hygR hrr1<sup>+</sup>::hrr1-13Myc-kanR swi6Δ::nat</i> |
| AHY624  | <i>h<sup>+</sup> ade6-M210 leu1-32 ura4DSIE otr1R::ura4<sup>+</sup> ers1<sup>+</sup>::ers1-13Myc-kanR hrr1<sup>+</sup>::hrr1-5Flag-kanR swi6Δ::nat</i> |
| SPM1626 | <i>h<sup>+</sup> ade6-M210 leu1-32 ura4-D18 otr1R::ade6<sup>+</sup> clr4Δ::kanR</i>                                                                    |
| SPM1675 | <i>h<sup>+</sup> ade6-M210 leu1-32 ura4-D18 chp2Δ::ura4<sup>+</sup></i>                                                                                |
| SMP1004 | <i>h90 ade6-M210 leu1-32 ura4-D18 chp1Δ::kanR</i>                                                                                                      |
| SPIT241 | <i>h<sup>+</sup> ade6-M210 leu1-32 ura4DSIE cnt1/TM-ura4<sup>+</sup> tas3Δ::kanR</i>                                                                   |
